# Supplementary material
Source: ML conference proceedings conference paper supplement (https://proceedings.neurips.cc/paper_files/paper/2014/hash/82161242827b703e6acf9c726942a1e4-Abstract.html)
Supplement: Supplementary file [file 82161242827b703e6acf9c726942a1e4-Supplemental.zip]

---

# From MAP to Marginals: Variational Inference in Bayesian Submodular Models

---

**Josip Djolonga**  
Department of Computer Science  
ETH Zürich  
josipd@inf.ethz.ch

**Andreas Krause**  
Department of Computer Science  
ETH Zürich  
krausea@ethz.ch

## Abstract

Submodular optimization has found many applications in machine learning and beyond. We carry out the first systematic investigation of inference in probabilistic models defined through submodular functions, generalizing regular pairwise MRFs and Determinantal Point Processes. In particular, we present L-FIELD, a variational approach to general log-submodular and log-supermodular distributions based on sub- and supergradients. We obtain *both* lower and upper bounds on the log-partition function, which enables us to compute probability intervals for marginals, conditionals and marginal likelihoods. We also obtain fully factorized approximate posteriors, at the same computational cost as ordinary submodular optimization. Our framework results in convex problems for optimizing over differentials of submodular functions, which we show how to optimally solve. We provide theoretical guarantees of the approximation quality with respect to the curvature of the function. We further establish natural relations between our variational approach and the classical mean-field method. Lastly, we empirically demonstrate the accuracy of our inference scheme on several submodular models.

## 1 Introduction

Submodular functions [1] are a rich class of set functions  $F : 2^V \rightarrow \mathbb{R}$ , investigated originally in game theory and combinatorial optimization. They capture natural notions such as diminishing returns and economies of scale. In recent years, submodular optimization has seen many important applications in machine learning, including active learning [2], recommender systems [3], document summarization [4], representation learning [5], clustering [6], the design of structured norms [7] etc. In this work, instead of using submodular functions to obtain point estimates through optimization, we take a Bayesian approach and define probabilistic models over sets (so called point processes) using submodular functions. Many of the aforementioned applications can be understood as performing MAP inference in such models. We develop L-FIELD, a general variational inference scheme for reasoning about *log-supermodular* ( $P(A) \propto \exp(-F(A))$ ) and *log-submodular* ( $P(A) \propto \exp(F(A))$ ) distributions, where  $F$  is a submodular set function.

**Previous work.** There has been extensive work on submodular optimization (both approximate and exact minimization and maximization, see, e.g., [8, 9, 10, 11]). In contrast, we are unaware of previous work that addresses the general problem of probabilistic inference in Bayesian submodular models. There are two important special cases that have received significant interest. The most prominent examples are undirected pairwise Markov Random Fields (MRFs) with binary variables, also called the Ising model [12], due to their importance in statistical physics, and applications, e.g., in computer vision. While MAP inference is efficient for regular (log-supermodular) MRFs, computing the partition function is known to be #P-hard [13], and the approximation problem has been also shown to be hard [14]. Also, there is no FPRAS in the log-submodular case unless RP=NP [13]. An important case of log-submodular distributions is the *Determinantal Point Process* (DPP), used

in machine learning as a principled way of modeling diversity. Its partition function can be computed efficiently, and a  $\frac{1}{4}$ -approximation scheme for finding the (NP-hard) MAP [15] is known. In this paper, we propose a variational inference scheme for general Bayesian submodular models, that encompasses these two and many other distributions, and has instance-dependent quality guarantees. A hallmark of the models is that they capture high-order interactions between many random variables. Existing variational approaches [16] cannot efficiently cope with such high-order interactions — they generally have to sum over all variables in a factor, scaling exponentially in the size of the factor. We discuss this prototypically for mean-field in Sec. 5.

**Our contributions.** In summary, our main contributions are

- We provide the first general treatment of probabilistic inference with log-submodular and log-supermodular distributions, that can capture *high-order variable interactions*.
- We develop L-FIELD, a novel variational inference scheme that optimizes over sub- and supergradients of submodular functions. Our scheme yields both upper and lower bounds on the partition function, which imply rigorous probability intervals for marginals. We can also obtain factorial approximations of the distribution at no larger computational cost than performing MAP inference in the model (for which a plethora of algorithms are available).
- We identify a natural link between our scheme and the well-known mean-field method.
- We establish theoretical guarantees about the accuracy of our bounds, dependent on the curvature of the underlying submodular function.
- We demonstrate the accuracy of L-FIELD on several Bayesian submodular models.

## 2 Submodular functions and optimization

Submodular functions are set functions satisfying a diminishing returns condition. Formally, let  $V$  be some finite ground set, w.l.o.g.  $V = \{1, \dots, n\}$ , and consider a set function  $F : 2^V \rightarrow \mathbb{R}$ . The marginal gain of adding item  $i \in V$  to the set  $A \subseteq V$  w.r.t.  $F$  is defined as  $F(i|A) = F(A \cup \{i\}) - F(A)$ . Then, a function  $F : 2^V \rightarrow \mathbb{R}$  is said to be *submodular* if for all  $A \subseteq B \subseteq V$  and  $i \in V - B$  it holds that  $F(i|A) \geq F(i|B)$ . A function  $F$  is called *supermodular* if  $-F$  is submodular. Without loss of generality<sup>1</sup>, we will also make the assumption that  $F$  is *normalized* so that  $F(\emptyset) = 0$ .

The problem of submodular function optimization has received significant attention. The (unconstrained) *minimization* of submodular functions,  $\min_A F(A)$ , can be done in polynomial time. While general purpose algorithms [8] can be impractical due to their high order, several classes of functions admit faster, specialized algorithms, e.g. [17, 18, 19]. Many important problems can be cast as the minimization of a submodular objective, ranging from image segmentation [20, 12] to clustering [6]. Submodular *maximization* has also found numerous applications, e.g. experimental design [21], document summarization [4] or representation learning [5]. While this problem is in general NP-hard, effective constant-factor approximation algorithms exist (e.g. [22, 11]).

In this paper we lift results from submodular optimization to probabilistic inference, which lets us quantify uncertainty about the solutions of the problem, instead of binding us to a single one. Our approach allows us to obtain (approximate) marginals at the same cost as traditional MAP inference.

## 3 Probabilistic inference in Bayesian submodular models

Which Bayesian models are associated with submodular functions? Suppose  $F : 2^V \rightarrow \mathbb{R}$  is a submodular set function. We consider distributions over subsets<sup>2</sup>  $A \subseteq V$  of the form  $P(A) = \frac{1}{\mathcal{Z}} e^{+F(A)}$  and  $P(A) = \frac{1}{\mathcal{Z}} e^{-F(A)}$ , which we call log-submodular and log-supermodular, respectively. The normalizing quantity  $\mathcal{Z} = \sum_{S \subseteq V} e^{\pm F(S)}$  is called the *partition function*, and  $-\log \mathcal{Z}$  is also known as *free energy* in the statistical physics literature. Note that distributions over subsets of  $V$  are isomorphic to distributions of  $|V| = n$  binary random variables  $X_1, \dots, X_n \in \{0, 1\}$  — we simply identify  $X_i$  as the indicator function of the event  $i \in A$ , or formally  $X_i = [i \in A]$ .

**Examples of log-supermodular distributions.** There are many distributions that fit this framework. As a prominent example, consider *binary pairwise Markov random fields (MRFs)*,

<sup>1</sup>The functions  $F(A)$  and  $F(A) + c$  encode the same distributions by virtue of normalization.

<sup>2</sup>In the appendix we also consider cardinality constraints, i.e., distributions over sets  $A$  that satisfy  $|A| \leq k$ .

$P(X_1, \dots, X_n) = \frac{1}{\mathcal{Z}} \prod_{i,j} \phi_{i,j}(X_i, X_j)$ . Assuming the potentials  $\phi_{i,j}$  are positive, such MRFs are equivalent to distributions  $P(A) \propto \exp(-F(A))$ , where  $F(A) = \sum_{i,j} F_{i,j}(A)$ , and  $F_{i,j}(A) = -\log \phi_{i,j}([i \in A], [j \in A])$ . An MRF is called *regular* iff each  $F_{i,j}$  is submodular (and consequently  $P(A)$  is log-supermodular). Such models are extensively used in applications, e.g. in computer vision [12]. More generally, a rich class of distributions can be defined using *decomposable submodular functions*, which can be written as sums of (usually simpler) submodular functions. As an example, let  $G_1, \dots, G_k \subseteq V$  be groups of elements and let  $\phi_1, \dots, \phi_k : [0, \infty) \rightarrow \mathbb{R}$  be concave. Then, the function  $F(A) = \sum_{i=1}^k \phi_i(|G_i \cap A|)$  is submodular. Models using these types of functions strictly generalize pairwise MRFs, and can capture higher-order variable interactions, which can be crucial in computer vision applications such as semantic segmentation (e.g. [23]).

**Examples of log-submodular distributions.** A prominent example of log-submodular distributions are *Determinantal Point Processes (DPPs)* [24]. A DPP is a distribution over sets  $A$  of the form  $P(A) = \frac{1}{\mathcal{Z}} \exp(F(A))$ , where  $F(A) = \log |K_A|$ . Here,  $K \in \mathbb{R}^{V \times V}$  is a positive semi-definite matrix,  $K_A$  is the square submatrix indexed by  $A$ , and  $|\cdot|$  denotes the determinant. Because  $K$  is positive semi-definite,  $F(A)$  is known to be submodular, and hence DPPs are log-submodular. Another natural model is that of facility location. Assume that we have a set of locations  $V$  where we can open shops, and a set  $N$  of customers that we would like to serve. For each customer  $i \in N$  and location  $j \in V$  we have a non-negative number  $C_{i,j}$  quantifying how much service  $i$  gets from location  $j$ . Then, we consider  $F(A) = \sum_{i \in N} \max_{j \in A} C_{i,j}$ . We can also penalize the number of open shops and use a distribution  $P(A) \propto \exp(F(A) - \lambda|A|)$  for  $\lambda > 0$ . Such objectives have been used for optimization in many applications, ranging from clustering [25] to recommender systems [26].

**The Inference Challenge.** Having introduced the models that we consider, we now show how to do inference in them<sup>3</sup>. Let us introduce the following operations that preserve submodularity.

**Definition 1.** Let  $F : 2^V \rightarrow \mathbb{R}$  be submodular and let  $X, Y \subseteq V$ . Define the submodular functions  $F^X$  as the restriction of  $F$  to  $2^X$ , and  $F_X : 2^{V-X} \rightarrow \mathbb{R}$  as  $F_X(A) = F(A \cup X) - F(X)$ .

First, let us see how to compute marginals. The probability that the random subset  $\mathbf{S}$  distributed as  $P(\mathbf{S} = A) \propto \exp(-F(A))$  is in some non-empty lattice  $[X, Y] = \{A \mid X \subseteq A \subseteq Y\}$  is equal to

$$P(\mathbf{S} \in [X, Y]) = \frac{1}{\mathcal{Z}} \sum_{X \subseteq A \subseteq Y} \exp(-F(A)) = \frac{1}{\mathcal{Z}} \sum_{A \subseteq Y-X} \exp(-F(X \cup A)) = e^{-F(X)} \frac{\mathcal{Z}_X^Y}{\mathcal{Z}}, \quad (1)$$

where  $\mathcal{Z}_X^Y = \sum_{A \subseteq Y-X} e^{-(F(X \cup A) - F(X))}$  is the partition function of  $(F_X)^Y$ . Marginals  $P(i \in \mathbf{S})$  of any  $i \in V$  can be obtained using  $[\{i\}, V]$ . We also obtain conditionals — if, for example, we condition on the event on (1), we have  $P(\mathbf{S} = A \mid \mathbf{S} \in [X, Y]) = \exp(-F(A)) / \mathcal{Z}_X^Y$  if  $A \in [X, Y]$ , 0 otherwise. Note that log-supermodular distributions are conjugate with each other: for a log-supermodular prior  $P(A) \propto \exp(-F(A))$  and a likelihood function<sup>4</sup>  $P(E \mid A) \propto \exp(-L(E; A))$ , for which  $L$  is submodular w.r.t.  $A$  for each evidence  $E$ , the posterior  $P(A \mid E) \propto \exp(-(F(A) + L(E; A)))$  is log-supermodular as well. The same holds for log-submodular distributions.

## 4 The variational approach

In Section 3 we have seen that due to the closure properties of submodular functions, important inference tasks (e.g., marginals, conditioning) in Bayesian submodular models require computing partition functions of suitably defined/restricted submodular functions. Given that the general problem is #P hard, we seek approximate methods. The main idea is to exploit the peculiar property of submodular functions that they can be *both lower- and upper-bounded* using simple additive functions of the form  $s(A) + c$ , where  $c \in \mathbb{R}$  and  $s : 2^V \rightarrow \mathbb{R}$  is *modular*, i.e. it satisfies  $s(A) = \sum_{i \in A} s(\{i\})$ . We will also treat modular functions  $s(\cdot)$  as vectors  $\mathbf{s} \in \mathbb{R}^V$  with coordinates  $s_i = s(\{i\})$ . Because modular functions have tractable log-partition functions, we obtain the following bounds.

**Lemma 1.** If  $\forall A \subseteq V : s_l(A) + c_l \leq F(A) \leq s_u(A) + c_u$  for modular  $s_u, s_l$ , and  $c_l, c_u \in \mathbb{R}$ , then

$$\begin{aligned} \log \mathcal{Z}^+(\mathbf{s}_l, c_l) &\leq \log \sum_{A \subseteq V} \exp(+F(A)) \leq \log \mathcal{Z}^+(\mathbf{s}_u, c_u) \text{ and} \\ \log \mathcal{Z}^-(\mathbf{s}_u, c_u) &\leq \log \sum_{A \subseteq V} \exp(-F(A)) \leq \log \mathcal{Z}^-(\mathbf{s}_l, c_l), \end{aligned}$$

where  $\log \mathcal{Z}^+(\mathbf{s}, c) = c + \sum_{i \in V} \log(1 + e^{s_i})$  and  $\log \mathcal{Z}^-(\mathbf{s}, c) = -c + \sum_{i \in V} \log(1 + e^{-s_i})$ .

<sup>3</sup>We consider log-supermodular distributions, as the log-submodular case is analogous.

<sup>4</sup>Such submodular loss functions  $L$  have been considered, e.g., in document summarization [4].

We can use any modular (upper or lower) bound  $s(A) + c$  to define a completely factorized distribution that can be used as a proxy to approximate values of interest of the original distribution. For example, the marginal of  $i \in A$  under  $Q(A) \propto \exp(-s(A) + c)$  is easily seen to be  $1/(1 + e^{s_i})$ .

Instead of optimizing over all possible bounds of the above form, we consider for each  $X \subseteq V$  two sets of modular functions, which are exact at  $X$  and lower- or upper-bound  $F$  respectively. Similarly as for convex functions, we define [8][§6.2] the *subdifferential* of  $F$  at  $X$  as

$$\partial_F(X) = \{\mathbf{s} \in \mathbb{R}^n \mid \forall Y \subseteq V: F(Y) \geq F(X) + \mathbf{s}(Y) - \mathbf{s}(X)\}. \quad (2)$$

The *superdifferential*  $\partial^F(X)$  is defined analogously by inverting the inequality sign [27]. For each *subgradient*  $\mathbf{s} \in \partial_F(X)$ , the function  $g_X(Y) = s(Y) + F(X) - s(X)$  is *lower bounding*  $F$ . Similarly, for a *supergradient*  $\mathbf{s} \in \partial^F(X)$ ,  $h_X(Y) = s(Y) + F(X) - s(X)$  is an *upper bound* of  $F$ . Note that both  $h_X$  and  $g_X$  are of the form that we considered (modular plus constant) and are tight at  $X$ , i.e.  $h_X(X) = g_X(X) = F(X)$ . Because we will be optimizing over differentials, we define for any  $X \subseteq V$  the shorthands  $\mathcal{Z}_X^+(\mathbf{s}) = \mathcal{Z}^+(\mathbf{s}, F(X) - s(X))$  and  $\mathcal{Z}_X^-(\mathbf{s}) = \mathcal{Z}^-(\mathbf{s}, F(X) - s(X))$ .

#### 4.1 Optimizing over subgradients

To analyze the problem of minimizing  $\log \mathcal{Z}_X^-(\mathbf{s})$  subject to  $\mathbf{s} \in \partial_F(X)$ , we introduce the *base polyhedron* of  $F$ , defined as  $B(F) = \{\mathbf{s} \in \mathbb{R}^V \mid s(V) = F(V) \text{ and } \forall A \subseteq V: s(A) \leq F(A)\}$ , i.e. the set of modular lower bounds that are exact at  $V$ . As the following lemma shows, we do not have to consider  $\log \mathcal{Z}_X^-$  for all  $X$  and we can restrict our attention to the case  $X = \emptyset$ .

**Lemma 2.** *For all  $X \subseteq V$  we have  $\min_{\mathbf{s} \in \partial_F(\emptyset)} \mathcal{Z}_\emptyset^-(\mathbf{s}) \leq \min_{\mathbf{s} \in \partial_F(X)} \mathcal{Z}_X^-(\mathbf{s})$ . Moreover, the former problem is equivalent to*

$$\underset{\mathbf{s}}{\text{minimize}} \sum_{i \in V} \log(1 + e^{-s_i}) \quad \text{subject to} \quad \mathbf{s} \in B(F). \quad (3)$$

Thus, we have to optimize a convex function over  $B(F)$ , a problem that has been already considered [8, 9]. For example, we can use the Frank-Wolfe algorithm [28, 29], which is easy to implement and has a convergence rate of  $O(\frac{1}{k})$ . It requires the optimization of linear functions  $g(\mathbf{s}) = \langle \mathbf{w}, \mathbf{s} \rangle = \mathbf{w}^T \mathbf{s}$  over the domain, which, as shown by Edmonds [1], can be done greedily in  $O(|V| \log |V|)$  time. More precisely, to compute a maximizer  $\mathbf{s}^* \in B(F)$  of  $g(\mathbf{s})$ , pick a bijection  $\sigma: \{1, \dots, |V|\} \rightarrow V$  that orders  $\mathbf{w}$ , i.e.  $w_{\sigma(1)} \geq w_{\sigma(2)} \geq \dots \geq w_{\sigma(|V|)}$ . Then, set  $s_{\sigma(i)}^* = F(\sigma(i) \mid \{\sigma(1), \dots, \sigma(i-1)\})$ . Alternatively, if we can efficiently minimize the sum of the function plus a modular term, e.g. for the family of graph-cut representable functions [10], we can apply the divide-and-conquer algorithm [9][§9.1], which needs the minimization of  $O(|V|)$  problems.

|                                                                                                                                                                                                                                                                                                                                                                                                                                                                                                                                                                                                                                                                                                                                                                                  |                                                                                                                                                                                                                                                                                                                                                                                                                                                                                                                                         |
|----------------------------------------------------------------------------------------------------------------------------------------------------------------------------------------------------------------------------------------------------------------------------------------------------------------------------------------------------------------------------------------------------------------------------------------------------------------------------------------------------------------------------------------------------------------------------------------------------------------------------------------------------------------------------------------------------------------------------------------------------------------------------------|-----------------------------------------------------------------------------------------------------------------------------------------------------------------------------------------------------------------------------------------------------------------------------------------------------------------------------------------------------------------------------------------------------------------------------------------------------------------------------------------------------------------------------------------|
| <pre> 1: <b>procedure</b> FRANK-WOLFE(<math>F, \mathbf{x}^1, \epsilon</math>) 2:   <i>Define</i> <math>f(\mathbf{x}) = \log(1 + e^{-\mathbf{x}})</math> <math>\triangleright</math> Elementwise. 3:   <b>for</b> <math>k \leftarrow 1, 2, \dots, T</math> <b>do</b> 4:     Pick <math>\mathbf{s} \in \text{argmin}_{\mathbf{x} \in B(F)} \langle \mathbf{x}, \nabla f(\mathbf{x}^k) \rangle</math> 5:     <b>if</b> <math>\langle \mathbf{x}^k - \mathbf{s}, \nabla f(\mathbf{x}^k) \rangle \leq \epsilon</math> <b>then</b> 6:       <b>return</b> <math>\mathbf{x}^k</math> <math>\triangleright</math> Small duality gap. 7:     <b>else</b> 8:       <math>\mathbf{x}^{k+1} = (1 - \gamma_k)\mathbf{x}^k + \gamma_k \mathbf{s}; \quad \gamma_k = \frac{2}{k+2}</math> </pre> | <pre> 1: <b>procedure</b> DIVIDE-CONQUER(<math>F</math>) 2:   <math>\mathbf{s} \leftarrow \frac{F(V)}{ V } \mathbf{1}; A^* \leftarrow \text{minimizer of } F(\cdot) - s(\cdot)</math> 3:   <b>if</b> <math>F(A^*) = s(A^*)</math> <b>then</b> 4:     <b>return</b> <math>\mathbf{s}</math> 5:   <b>else</b> 6:     <math>\mathbf{s}_A \leftarrow \text{DIVIDE-CONQUER}(F^A)</math> 7:     <math>\mathbf{s}_{V-A} \leftarrow \text{DIVIDE-CONQUER}(F_A)</math> 8:     <b>return</b> <math>(\mathbf{s}_A, \mathbf{s}_{V-A})</math> </pre> |
|----------------------------------------------------------------------------------------------------------------------------------------------------------------------------------------------------------------------------------------------------------------------------------------------------------------------------------------------------------------------------------------------------------------------------------------------------------------------------------------------------------------------------------------------------------------------------------------------------------------------------------------------------------------------------------------------------------------------------------------------------------------------------------|-----------------------------------------------------------------------------------------------------------------------------------------------------------------------------------------------------------------------------------------------------------------------------------------------------------------------------------------------------------------------------------------------------------------------------------------------------------------------------------------------------------------------------------------|

**The entropy viewpoint and the Fenchel dual.** Interestingly, (3) can be interpreted as a maximum entropy problem. Recall that, for  $\mathbf{s} \in B(F)$  we use the distribution  $P(A) \propto \exp(-s(A))$ , whose entropy is exactly the negative of our objective. Hence, we can consider Problem (3) as that of maximizing the entropy over the set of factorized distributions with parameters in  $-B(F)$ . We can go back to the standard representation using the marginals  $\mathbf{p}$  via  $p_i = 1/(1 + \exp(s_i))$ . This becomes obvious if we consider the Fenchel dual of the problem, which, as discussed in §5, allows us to make connections with the classical mean-field approach. To this end, we introduce the Lovàsz extension, defined for any  $F: 2^V \rightarrow \mathbb{R}$  as the support function over  $B(F)$ , i.e.  $f(\mathbf{p}) = \sup_{\mathbf{s} \in B(F)} \mathbf{s}^T \mathbf{p}$  [30]. Let us also define for  $\mathbf{p} \in [0, 1]^V$  by  $\mathbb{H}[\mathbf{p}]$  the Shannon entropy of a vector of  $|V|$  independent Bernoulli random variables with success probabilities  $\mathbf{p}$ .

**Lemma 3.** *The Fenchel dual problem of Problem (3) is*

$$\underset{\mathbf{p} \in [0,1]^V}{\text{maximize}} \quad \mathbb{H}[\mathbf{p}] - f(\mathbf{p}). \quad (4)$$

Moreover, there is zero duality gap, and the pair  $(\mathbf{s}^*, \mathbf{p}^*)$  is primal-dual optimal if and only if

$$\mathbf{p}^* = \left( \frac{1}{1 + \exp(s_i^*)}, \dots, \frac{1}{1 + \exp(s_n^*)} \right) \quad \text{and} \quad f(\mathbf{p}^*) = \mathbf{p}^{*T} \mathbf{s}^*. \quad (5)$$

From the discussion above, it can be easily seen that the Fenchel dual reparameterizes the problem from the parameters  $-\mathbf{s}$  to the marginals  $\mathbf{p}$ . Note that the dual lets us provide a certificate of optimality, as the Lovász extension can be computed with Edmonds' greedy algorithm.

## 4.2 Optimizing over supergradients

To optimize over subgradients, we pick for each set  $X \subseteq V$  a representative supergradient and optimize over all  $X$ . As in [27], we consider the following supergradients, elements of  $\partial^F(X)$ .

|              | Grow supergradient $\hat{\mathbf{s}}^X$      | Shrink supergradient $\check{\mathbf{s}}^X$    | Bar supergradient $\bar{\mathbf{s}}^X$       |
|--------------|----------------------------------------------|------------------------------------------------|----------------------------------------------|
| $i \in X$    | $\hat{\mathbf{s}}^X(\{i\}) = F(i V - \{i\})$ | $\check{\mathbf{s}}^X(\{i\}) = F(i X - \{i\})$ | $\bar{\mathbf{s}}^X(\{i\}) = F(i V - \{i\})$ |
| $i \notin X$ | $\hat{\mathbf{s}}^X(\{i\}) = F(i X)$         | $\check{\mathbf{s}}^X(\{i\}) = F(\{i\})$       | $\bar{\mathbf{s}}^X(\{i\}) = F(\{i\})$       |

Optimizing the bound over *bar* supergradients requires the minimization of the original function plus a modular term. As already mentioned for the divide-and-conquer strategy above, we can do this efficiently for several problems. The exact formulation of the problem is presented below.

**Lemma 4.** *Define the modular functions  $m_1(\{i\}) = \log(1 + e^{-F(i|V-i)}) - \log(1 + e^{F(i)})$ , and  $m_2(\{i\}) = \log(1 + e^{F(i|V-i)}) - \log(1 + e^{-F(i)})$ . The following pairs of problems are equivalent.*

$$\begin{aligned} \underset{X}{\text{minimize}} \log \mathcal{Z}_X^+(\bar{\mathbf{s}}^X) &\equiv \underset{X}{\text{minimize}} F(X) + m_1(X) \\ \underset{X}{\text{maximize}} \log \mathcal{Z}_X^-(\bar{\mathbf{s}}^X) &\equiv \underset{X}{\text{minimize}} F(X) - m_2(X) \end{aligned}$$

Even though we cannot optimize over *grow* and *shrink* supergradients, we can evaluate all three at the optimum for the problems above and pick the one that gives the best bound.

## 5 Mean-field methods and the multi-linear extension

Is there a relation to traditional variational methods? If  $Q(\cdot)$  is a distribution over subsets of  $V$ , then

$$0 \leq \mathbb{KL}(Q \parallel P) = \mathbb{E}_Q \left[ \log \frac{Q(\mathbf{S})}{P(\mathbf{S})} \right] = \log \mathcal{Z} + \mathbb{E}_Q \left[ \log \frac{Q(\mathbf{S})}{\exp(-F(\mathbf{S}))} \right] = \log \mathcal{Z} - \mathbb{H}[Q] + \mathbb{E}_Q[F],$$

which yields the bound  $\log \mathcal{Z} \geq \mathbb{H}[Q] - \mathbb{E}_Q[F]$ . The *mean-field* method restricts  $Q$  to be a completely factorized distribution, so that elements are picked independently and  $Q$  can be described by the vector of marginals  $\mathbf{q} \in [0, 1]^V$ , over which it is then optimized. Compare this with our approach.

| Mean-Field Objective                                                                                     | Our Objective: L-FIELD                                                                      |
|----------------------------------------------------------------------------------------------------------|---------------------------------------------------------------------------------------------|
| $\underset{\mathbf{q} \in [0,1]^V}{\text{maximize}} \mathbb{H}[\mathbf{q}] - \mathbb{E}_{\mathbf{q}}[F]$ | $\underset{\mathbf{q} \in [0,1]^V}{\text{maximize}} \mathbb{H}[\mathbf{q}] - f(\mathbf{q})$ |
| $\triangleright$ <i>Non-concave, can be hard to evaluate.</i>                                            | $\triangleright$ <i>Concave, efficient to evaluate.</i>                                     |

Both the Lovász extension  $f(\mathbf{q})$  and the multi-linear extension  $\tilde{f}(\mathbf{q}) = \mathbb{E}_{\mathbf{q}}[F]$  are continuous extensions of  $F$ , introduced for submodular minimization [30] and maximization [31], respectively. The former agrees with the convex envelope of  $F$  and can be efficiently evaluated (in  $O(|V|)$  evaluations of  $F$ ) using Edmonds' greedy algorithm (cf., §4.1, [1]). In contrast, evaluating  $\tilde{f}(\mathbf{q}) = \mathbb{E}_{\mathbf{q}}[F] = \sum_{A \subseteq V} \prod_i q_i^{[i \in A]} (1 - q_i)^{[i \notin A]} F(A)$  in general requires summing over exponentially many terms – a problem potentially as hard as the original inference problem! Even if  $\tilde{f}(\mathbf{q})$  is approximated by sampling, it is neither convex nor concave. Moreover, computing the coordinate ascent updates of mean-field can be intractable for general  $F$ . Hence, our approach can be motivated as follows: instead of using the multi-linear extension  $\tilde{f}$ , we use the Lovász extension  $f$  of  $F$ , which makes the problem convex and tractable. This analogy motivated the name L-FIELD (L for Lovász).

## 6 Curvature-dependent approximation bounds

How accurate are the bounds obtained via our variational approach? We now provide theoretical guarantees on the approximation quality as a function of the *curvature* of  $F$ , which quantifies how far the function is from modularity. Curvature is defined for *polymatroid* functions, which are normalized non-decreasing submodular functions, i.e., a submodular function  $F : 2^V \rightarrow \mathbb{R}$  is polymatroid if for all  $A \subseteq B \subseteq V$  it holds that  $F(A) \leq F(B)$ .

**Definition 2** (From [32]). *Let  $G : 2^V \rightarrow \mathbb{R}$  be a polymatroid function. The curvature  $\kappa$  of  $G$  is defined as<sup>5</sup>  $\kappa = 1 - \min_{i \in V: G(\{i\}) > 0} \frac{G(i|V-\{i\})}{G(\{i\})}$ .*

The curvature is always between 0 and 1 and is equal to 0 if and only if the function is modular. Although the curvature is a notion for polymatroid functions, we can still show results for the general case as any submodular function  $F$  can be decomposed [33] as the sum of a modular term  $m(\cdot)$  defined as  $m(\{i\}) = F(i|V-\{i\})$  and  $G = F - m$ , which is a polymatroid function. Our bounds below depend on the curvature of  $G$  and  $G_{\text{MAX}} = G(V) = F(V) - \sum_{i \in V} F(i|V-i)$ .

**Theorem 1.** *Let  $F = G + m$ , where  $G$  is polymatroid with curvature  $\kappa$  and  $m$  is modular defined as above. Pick any bijection  $\sigma : V \rightarrow \{1, 2, \dots, |V|\}$  and define sets  $S_0^\sigma = \emptyset, S_i^\sigma = \{\sigma(1), \dots, \sigma(i)\}$ . If we define  $\mathbf{s} : s_{\sigma(i)} = G(S_i^\sigma) - G(S_{i-1}^\sigma)$ , then  $\mathbf{s} + \mathbf{m} \in \partial_F(\emptyset)$  and the following inequalities hold.*

$$\log \mathcal{Z}^-(\mathbf{s} + \mathbf{m}, 0) - \log \sum_{A \subseteq V} \exp(-F(A)) \leq \kappa G_{\text{MAX}} \quad (6)$$

$$\log \sum_{A \subseteq V} \exp(+F(A)) - \log \mathcal{Z}^+(\mathbf{s} + \mathbf{m}, 0) \leq \kappa G_{\text{MAX}} \quad (7)$$

**Theorem 2.** *Under the same assumptions as in Theorem 1, if we define the modular function  $s(\cdot)$  by  $s(A) = \sum_{i \in A} G(\{i\})$ , then  $\mathbf{s} + \mathbf{m} \in \partial^F(\emptyset)$  and the following inequalities hold.*

$$\log \sum_{A \subseteq V} \exp(-F(A)) - \log \mathcal{Z}^-(\mathbf{s} + \mathbf{m}, 0) \leq \frac{\kappa(n-1)}{1 + (n-1)(1-\kappa)} G_{\text{MAX}} \leq \frac{\kappa}{1-\kappa} G_{\text{MAX}} \quad (8)$$

$$\log \mathcal{Z}^+(\mathbf{s} + \mathbf{m}, 0) - \log \sum_{A \subseteq V} \exp(+F(A)) \leq \frac{\kappa(n-1)}{1 + (n-1)(1-\kappa)} G_{\text{MAX}} \leq \frac{\kappa}{1-\kappa} G_{\text{MAX}} \quad (9)$$

Note that we establish bounds for *specific* sub-/supergradients. Since our variational scheme considers these in the optimization as well, the same quality guarantees hold for the optimized bounds. Further, note that we get a dependence on the range of the function via  $G_{\text{MAX}}$ . However, if we consider  $\alpha F$  for large  $\alpha > 1$ , most of the mass will be concentrated at the MAP (assuming it is unique). In this case, L-FIELD also performs well, as it can always choose gradients that are tight at the MAP. When we optimize over supergradients, all possible tight sets are considered. Similarly, the subgradients are optimized over  $B(F)$ , and for any  $X \subseteq V$  there exists some  $\mathbf{s}_X \in B(F)$  tight at  $X$ .

## 7 Experiments

Our experiments<sup>6</sup> aim to address four main questions: (1) How large is the gap between the upper- and lower-bounds for the log-partition function and the marginals? (2) How accurate are the factorized approximations obtained from a *single* MAP-like optimization problem? (3) How does the accuracy depend on the amount of evidence (i.e., concentration of the posterior), the curvature of the function, and the type of Bayesian submodular model considered? (4) How does L-FIELD compare to *mean-field* on problems where the latter can be applied?

We consider approximate marginals obtained from the following methods: *lower/upper*: obtained from the factorized distributions associated with the modular lower/upper bounds; *lower-/upper-bound*: the lower/upper bound of the estimated probability interval. All of the functions we consider are graph-representable [17], which allows us to perform the optimization over superdifferentials using a single graph cut and use the exact divide-and-conquer algorithm. We used the min-cut

<sup>5</sup>We differ from the convention to remove  $i \in V$  s.t.  $G(\{i\}) = 0$ . Please see the appendix for a discussion.

<sup>6</sup>The code will be made available at <http://las.ethz.ch>.

implementation from [34]. Since the update equations are easily computable, we have also implemented mean-field for the first experiment. For the other two experiments computing the updates requires exhaustive enumeration and is intractable. The results are shown on Figure 1 and the experiments are explained below. We plot the averages of several repetitions of the experiments. Note that computing intervals for marginals requires two MAP-like optimizations per variable; hence we focus on small problems with  $|V| = 100$ . We point out that obtaining a single factorized approximation (as produced, e.g., by mean-field), only requires a *single MAP-like optimization*, which can be done for more than 270,000 variables [19].

**Log-supermodular: Cuts / Pairwise MRFs.** Our first experiment evaluates L-FIELD on a sequence of distributions that are increasingly more concentrated. Motivated by applications in semi-supervised learning, we sampled data from a 2-dimensional Gaussian mixture model with 2 clusters. The centers were sampled from  $\mathcal{N}([3, 3], I)$  and  $\mathcal{N}([-3, -3], I)$  respectively. For each cluster, we sampled  $n = 50$  points from a bivariate normal. These  $2n$  points were then used as nodes to create a graph with weight between points  $\mathbf{x}$  and  $\mathbf{x}'$  equal to  $e^{-\|\mathbf{x}-\mathbf{x}'\|}$ . As prior we chose  $P(A) \propto \exp(-F(A))$ , where  $F$  is the cut function in this graph, hence  $P(A)$  is a regular MRF. Then, for  $k = 1, \dots, n$  we consider the conditional distribution on the event that  $k$  points from the first cluster are on one side of the cut and  $k$  points from the other cluster are on the other side. As we provide more evidence, the posterior concentrates, and the intervals for both the log-partition function and marginals shrink. Compared with ground truth, the estimates of the marginal probabilities improve as well. Due to non-convexity, mean-field occasionally gets stuck in local optima, resulting in very poor marginals. To prevent this, we chose the best run out of 20 random restarts. These best runs produced slightly better marginals than L-FIELD for this model, at the cost of less robustness.

**Log-supermodular: Decomposable functions.** Our second experiment assesses the performance as a function of the curvature of  $F$ . It is motivated by a problem in outbreak detection on networks. Assume that we have a graph  $G = (V, E)$  and some of its nodes  $E \subseteq V$  have been infected by some contagious process. Instead of  $E$ , we observe a noisy set  $N \subseteq V$ , corrupted with a false positive rate of 0.1 and a false negative rate of 0.2. We used a log-supermodular prior  $P(A) \propto \exp\left(-\sum_{v \in V} \left(\frac{|N_v \cap A|}{|N_v|}\right)^\mu\right)$ , where  $\mu \in [0, 1]$  and  $N_v$  is the union of  $v$  and its neighbors. This prior prefers smaller sets and sets that are more clustered on the graph. Note that  $\mu$  controls the preference of clustered nodes and affects the curvature. We sampled random graphs with 100 nodes from a Watts-Strogatz model and obtained  $E$  by running an independent cascade starting from 2 random nodes. Then, for varying  $\mu$ , we consider the posterior, which is log-supermodular, as the noise model results in a modular likelihood. As the curvature increases, the intervals for both the log-partition function and marginals decrease as expected. Surprisingly, the marginals are very accurate ( $< 0.1$  average error) even for very large curvature. This suggests that our curvature dependent bounds are very conservative, and much better performance can be expected in practice.

**Log-submodular: Facility location modeling.** Our last experiment evaluates how accurate L-FIELD is when quantifying uncertainty in submodular maximization tasks. Concretely, we consider the problem of sensor placement in water distribution networks, which can be modeled as submodular maximization [35]. More specifically, we have a water distribution network and there are some junctions  $V$  where we can put sensors that can detect contaminated water. We also have a set  $\mathcal{I}$  of contamination scenarios. For each  $i \in \mathcal{I}$  and  $j \in V$  we have a utility  $C_{i,j} \in [0, 1]$ , that comes from real data [35]. Moreover, as the sensors are expensive, we would like to use as few as possible. We use the facility-location model, more precisely  $P(\mathbf{S} = A) \propto \exp(F(A) - 2|A|)$ , with  $F(A) = \sum_{i \in \mathcal{I}} \max_{j \in A} C_{i,j}$ . Instead of optimizing for a fixed placement, here we consider the problem of *sampling* from  $P$  in order to quantify the uncertainty in the optimization task. We used the following sampling strategy. We consider nodes  $v \in V$  in some order. We then sample a Bernoulli  $Z$  with probability  $P(Z = 1) = q_v$  based on the factorized distribution  $\mathbf{q}$  from the modular upper bound. We then condition on  $v \in \mathbf{S}$  if  $Z = 1$ , or  $v \notin \mathbf{S}$  if  $Z = 0$ . In the computation of the lower bound we used the subgradient  $\mathbf{s}^g$  computed from the greedy order of  $V$  — the  $i$ -th element in this order  $v_1, \dots, v_n$  is the one that gives the highest improvement when added to the set formed by the previous  $i - 1$  elements. Then,  $\mathbf{s}^g \in \partial_F(\emptyset): s_i^g = F(v_i | \{v_0, \dots, v_{i-1}\})$ . We repeated the experiment several times using randomly sampled 500 contamination scenarios and 100 locations from a larger dataset. Note that our approximations get better as we condition on more information (i.e., proceed through the iterations of the sampling procedure above). Also note that even from the very beginning, the marginals are very accurate ( $< 0.1$  average error).

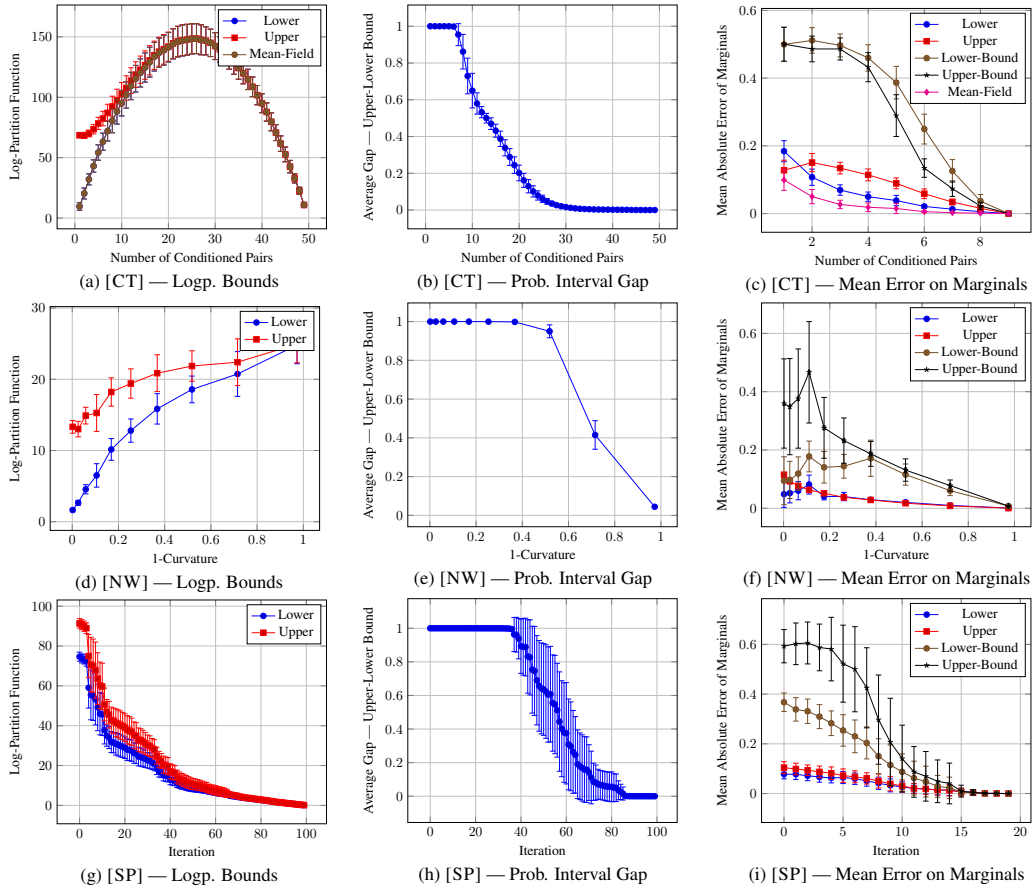

Figure 1: Experiments on [CT] Cuts (*a-c*), [NW] network detection (*d-f*), [SP] sensor placement (*g-i*). Note that to generate (*c,f,i*) we had to compute the exact marginals by exhaustive enumeration. Hence, these three graphs were created using a smaller ground set of size 20. The error bars capture 3 standard errors.

## 8 Conclusion

We proposed L-FIELD, the first variational method for approximate inference in general Bayesian submodular and supermodular models. Our approach has several attractive properties: It produces rigorous upper and lower bounds on the log-partition function and on marginal probabilities. These bounds can be optimized efficiently via convex and submodular optimization. Accurate factorial approximations can be obtained at the same computational cost as performing MAP inference in the underlying model, a problem for which a vast array of scalable methods are available. Furthermore, we identified a natural connection to the traditional mean-field method and bounded the quality of our approximations with the curvature of the function. Our experiments demonstrate the accuracy of our inference scheme on several natural examples of Bayesian submodular models. We believe that our results present a significant step in understanding the role of submodularity – so far mainly considered for optimization – in approximate Bayesian inference. Furthermore, L-FIELD presents a significant advance in our ability to perform probabilistic inference in models with complex, high-order dependencies, which present a major challenge for classical techniques.

**Acknowledgments.** This research was supported in part by SNSF grant 200021\_137528, ERC StG 307036 and a Microsoft Research Faculty Fellowship.

## References

- [1] J. Edmonds. “Submodular functions, matroids, and certain polyhedra”. In: *Combinatorial structures and their applications* (1970), pp. 69–87.
- [2] D. Golovin and A. Krause. “Adaptive Submodularity: Theory and Applications in Active Learning and Stochastic Optimization”. In: *Journal of Artificial Intelligence Research (JAIR)* 42 (2011), pp. 427–486.



- [3] Y. Yue and C. Guestrin. “Linear Submodular Bandits and its Application to Diversified Retrieval”. In: *Neural Information Processing Systems (NIPS)*. 2011.
- [4] H. Lin and J. Bilmes. “A class of submodular functions for document summarization”. In: *49th Annual Meeting of the Association for Computational Linguistics: HLT*. 2011, pp. 510–520.
- [5] V. Cevher and A. Krause. “Greedy Dictionary Selection for Sparse Representation”. In: *IEEE Journal of Selected Topics in Signal Processing* 99.5 (2011), pp. 979–988.
- [6] M. Narasimhan, N. Jojic, and J. Bilmes. “Q-clustering”. In: *NIPS*. Vol. 5. 10.10. 2005, p. 5.
- [7] F. Bach. “Structured sparsity-inducing norms through submodular functions.” In: *NIPS*. 2010.
- [8] S. Fujishige. *Submodular functions and optimization*. Vol. 58. Annals of Discrete Mathematics. 2005.
- [9] F. Bach. “Learning with submodular functions: a convex optimization perspective”. In: *Foundations and Trends® in Machine Learning* 6.2-3 (2013), pp. 145–373. ISSN: 1935-8237.
- [10] S. Jegelka, H. Lin, and J. A. Bilmes. “On fast approximate submodular minimization.” In: *NIPS*. 2011.
- [11] N. Buchbinder, M. Feldman, J. Naor, and R. Schwartz. “A tight linear time (1/2)-approximation for unconstrained submodular maximization”. In: *Foundations of Computer Science (FOCS)*. 2012.
- [12] Y. Boykov, O. Veksler, and R. Zabih. “Fast approximate energy minimization via graph cuts”. In: *Pattern Analysis and Machine Intelligence, IEEE Transactions on* 23.11 (2001), pp. 1222–1239.
- [13] M. Jerrum and A. Sinclair. “Polynomial-time approximation algorithms for the Ising model”. In: *SIAM Journal on computing* 22.5 (1993), pp. 1087–1116.
- [14] L. A. Goldberg and M. Jerrum. “The complexity of ferromagnetic Ising with local fields”. In: *Combinatorics, Probability and Computing* 16.01 (2007), pp. 43–61.
- [15] J. Gillenwater, A. Kulesza, and B. Taskar. “Near-Optimal MAP Inference for Determinantal Point Processes”. In: *Proc. Neural Information Processing Systems (NIPS)*. 2012.
- [16] M. J. Wainwright and M. I. Jordan. “Graphical Models, Exponential Families, and Variational Inference”. In: *Found. Trends Mach. Learn.* 1.1-2 (2008), pp. 1–305.
- [17] V. Kolmogorov and R. Zabih. “What energy functions can be minimized via graph cuts?” In: *Pattern Analysis and Machine Intelligence, IEEE Transactions on* 26.2 (2004), pp. 147–159.
- [18] P. Stobbe and A. Krause. “Efficient Minimization of Decomposable Submodular Functions”. In: *Proc. Neural Information Processing Systems (NIPS)*. 2010.
- [19] S. Jegelka, F. Bach, and S. Sra. “Reflection methods for user-friendly submodular optimization”. In: *Advances in Neural Information Processing Systems*. 2013, pp. 1313–1321.
- [20] S. Jegelka and J. Bilmes. “Submodularity beyond submodular energies: coupling edges in graph cuts”. In: *Computer Vision and Pattern Recognition (CVPR), 2011 IEEE Conference on*. 2011, pp. 1897–1904.
- [21] A. Krause and C. Guestrin. “Near-optimal Nonmyopic Value of Information in Graphical Models”. In: *Conference on Uncertainty in Artificial Intelligence (UAI)*. 2005.
- [22] A. Krause and D. Golovin. “Submodular Function Maximization”. In: *Tractability: Practical Approaches to Hard Problems (to appear)*. Cambridge University Press, 2014.
- [23] P. Kohli, L. Ladický, and P. H. Torr. “Robust higher order potentials for enforcing label consistency”. In: *International Journal of Computer Vision* 82.3 (2009), pp. 302–324.
- [24] A. Kulesza and B. Taskar. “Determinantal Point Processes for Machine Learning”. In: *Foundations and Trends in Machine Learning* 5.2–3 (2012).
- [25] R. Gomes and A. Krause. “Budgeted Nonparametric Learning from Data Streams”. In: *ICML*. 2010.
- [26] K. El-Arini, G. Veda, D. Shahaf, and C. Guestrin. “Turning down the noise in the blogosphere”. In: *Proc. ACM SIGKDD International Conference on Knowledge Discovery and Data mining*. 2009.
- [27] R. Iyer, S. Jegelka, and J. Bilmes. “Fast Semidifferential-based Submodular Function Optimization”. In: *ICML (3)*. 2013, pp. 855–863.
- [28] M. Frank and P. Wolfe. “An algorithm for quadratic programming”. In: *Naval Research Logistics Quarterly* 3.1-2 (1956), pp. 95–110. ISSN: 1931-9193.
- [29] M. Jaggi. “Revisiting Frank-Wolfe: Projection-free sparse convex optimization”. In: *30th International Conference on Machine Learning (ICML-13)*. 2013, pp. 427–435.
- [30] L. Lovász. “Submodular functions and convexity”. In: *Mathematical Programming The State of the Art*. Springer, 1983, pp. 235–257.
- [31] G. Calinescu, C. Chekuri, M. Pál, and J. Vondrák. “Maximizing a submodular set function subject to a matroid constraint”. In: *Integer programming and combinatorial optimization*. Springer, 2007.
- [32] M. Conforti and G. Cornuejols. “Submodular set functions, matroids and the greedy algorithm: tight worst-case bounds and some generalizations of the Rado-Edmonds theorem”. In: *Discrete applied mathematics* 7.3 (1984), pp. 251–274.
- [33] W. H. Cunningham. “Decomposition of submodular functions”. In: *Combinatorica* 3.1 (1983).
- [34] Y. Boykov and V. Kolmogorov. “An experimental comparison of min-cut/max-flow algorithms for energy minimization in vision”. In: *Pattern Analysis and Machine Intelligence, IEEE Trans. on* 26.9 (2004).
- [35] A. Krause, J. Leskovec, C. Guestrin, J. VanBriesen, and C. Faloutsos. “Efficient Sensor Placement Optimization for Securing Large Water Distribution Networks”. In: *Journal of Water Resources Planning and Management* 134.6 (2008), pp. 516–526.
- [36] S. P. Boyd and L. Vandenberghe. *Convex Optimization*. Cambridge University Press, 2004.
- [37] R. T. Rockafellar. “Extension of Fenchel’ duality theorem for convex functions”. In: *Duke Mathematical Journal* 33.1 (Mar. 1966), pp. 81–89.

- [38] R. K. Iyer, S. Jegelka, and J. Bilmes. “Curvature and Optimal Algorithms for Learning and Minimizing Submodular Functions”. In: *Advances in Neural Information Processing Systems*. 2013, pp. 2742–2750.

# Appendix

## A Closure properties for inference in Bayesian submodular models

We first give a brief derivation that shows that the conditional distribution is the one we claimed.

$$P(\mathbf{S} = A | \mathbf{S} \in [X, Y]) = \frac{P(\mathbf{S} \in [X, Y] | \mathbf{S}) P(\mathbf{S} = A)}{P(\mathbf{S} \in [X, Y])} = \begin{cases} \exp(-F(A)) / \mathcal{Z}_X^Y & \text{if } A \in [X, Y] \\ 0 & \text{otherwise} \end{cases} \quad (10)$$

Similarly to the conditioning that the set is in some lattice, we would also like to point out that using similar computations you also condition on different events. For example, if we condition on the event that the complement of the set is in  $[X, Y]$  we have that

$$P(V - \mathbf{S} \in [X, Y]) = \frac{1}{\mathcal{Z}} \sum_{X \subseteq V - A \subseteq Y} \exp(-F(A)) = \frac{1}{\mathcal{Z}} \sum_{X \subseteq B \subseteq Y} \exp(-F(V - B)).$$

The function  $G(B) = F(V - B)$  is submodular, and the computation again reduces to computing normalization constants of submodular functions.

## B Proofs for our variational approach

*Proof of Lemma 1.* Let  $g(A) = s(A) + c$  for a modular  $s(\cdot)$  be an upper or a lower bound on  $F$ . Then, using  $n = |V|$ , we have that

$$\begin{aligned} \log \mathcal{Z} &= \log \sum_{A \subseteq V} \exp(-F(A)) \circ \log \sum_{A \subseteq V} \exp(-s(A) - c) \stackrel{(a)}{=} -c + \log \sum_{\mathbf{x} \in \{0,1\}^n} \exp(-\mathbf{s}^T \mathbf{x}) \\ &= -c + \log \sum_{\mathbf{x} \in \{0,1\}^n} \prod_{i=1}^n \exp(-s_i)^{x_i} = -c + \log \prod_{i=1}^n (1 + \exp(-s_i)) = \log \mathcal{Z}^-(\mathbf{s}, c), \end{aligned}$$

where  $\circ$  is  $\leq$  for a lower bound and  $\geq$  for an upper bound. In step (a) we have used the correspondence between subsets of  $V$  and  $\{0, 1\}^n$  vectors. The other case follows analogously.

$$\begin{aligned} \log \mathcal{Z} &= \log \sum_{A \subseteq V} \exp(F(A)) \circ \log \sum_{A \subseteq V} \exp(s(A) + c) = c + \log \sum_{\mathbf{x} \in \{0,1\}^n} \exp(\mathbf{s}^T \mathbf{x}) \\ &= c + \log \sum_{\mathbf{x} \in \{0,1\}^n} \prod_{i=1}^n \exp(s_i)^{x_i} = c + \log \prod_{i=1}^n (1 + \exp(s_i)) = \log \mathcal{Z}^+(\mathbf{s}, c), \end{aligned}$$

where  $\circ$  is  $\leq$  for an upper bound and  $\geq$  for a lower bound.  $\square$

**Approximation to Marginals.** The marginals under a modular distribution can be easily computed as follows. If  $F(A) = \frac{1}{\mathcal{Z}} \exp(-s(A) - c)$  for some modular  $\mathbf{s}$ , then for any  $i \in V$

$$\begin{aligned} P(i \in \mathbf{S}) &= \frac{1}{\mathcal{Z}} \sum_{A \subseteq V - \{i\}} e^{-s_i - s(A) - c} = \frac{e^{-s_i - c}}{\mathcal{Z}} \sum_{A \subseteq V - \{i\}} e^{-s(A)} \\ &= \frac{e^{-s_i - c}}{\mathcal{Z}} \prod_{j \in V - \{i\}} (1 + e^{-s_j}) = \frac{e^{-s_i - c}}{e^{-c} \prod_{j \in V} (1 + e^{-s_j})} \prod_{j \in V - \{i\}} (1 + e^{-s_j}) \\ &= \frac{e^{-s_i}}{1 + e^{-s_i}} = \frac{1}{1 + e^{s_i}}. \end{aligned}$$

### B.1 Optimizing over subgradients

Before showing the proofs, we first have to make two definitions. Let  $F : 2^V \rightarrow \mathbb{R}$  be a normalized submodular function. The *submodular polyhedron* of  $F$  is defined as

$$P(F) = \{\mathbf{s} \in \mathbb{R}^V \mid \forall A \subseteq V : s(A) \leq F(A)\}. \quad (11)$$

Note that  $P(F) = \partial_0(F)$ . For any  $X \subseteq V$  we also define the submodular function  $\overline{F} : 2^V \rightarrow \mathbb{R}$  as  $\overline{F}(A) = F(V - A) - F(V)$ .

**Theorem 3.** Let  $F : 2^V \rightarrow \mathbb{R}$  be a normalized submodular function and let  $X \subseteq V$ . Then

$$\partial_F(X) = (-\partial_{\overline{F^X}}(\emptyset)) \times \partial_{F_X}(\emptyset).$$

*Proof.* This follows from several results in the book by Fujishige [8], but for completeness we give a short proof here. From [8][Lem. 6.5] we know that

$$\partial_F(X) = \partial_{F^X}(X) \times \partial_{F_X}(\emptyset).$$

The result follows from the following lemma. □

**Lemma 5.** Let  $G : 2^U \rightarrow \mathbb{R}$  be a normalized submodular function. Then  $\partial_G(U) = -\partial_{\overline{G}}(\emptyset)$ .

*Proof.* Let  $\mathbf{s} \in \partial_{\overline{G}}(\emptyset)$ . This is true iff for all  $A \subseteq U$

$$s(A) \leq \overline{G}(A) \iff s(A) \leq G(U - A) - G(U) \iff s(A) + G(U) \leq G(U - A).$$

As this holds for all  $A \subseteq U$ , for any  $B \subseteq U$  we can set  $A = U - B$ , in which case  $U - (U - B) = B$  and we get (s is modular so  $s(U - B) = s(U) - s(B)$ )

$$s(U - B) + G(U) \leq G(B) \iff -s(B) + s(U) + G(U) \leq G(B).$$

By reordering the terms we get  $G(B) + s(B) \geq s(U) + G(U)$ . If we compare this with the definition of  $\partial_G(U)$  we get that  $\partial_{\overline{G}}(\emptyset) = -\partial_G(U)$ . □

**Lemma 6.** The problem of minimizing  $\mathcal{Z}_X^-(\mathbf{s})$  subject to  $\mathbf{s} \in \partial_F(X)$  is equivalent to the following strictly convex separable problem

$$\underset{\mathbf{s}}{\text{minimize}} -F(X) + \sum_{i \in V} \log(1 + e^{-s_i}) \quad \text{subject to} \quad \mathbf{s} \in B(\overline{F^X}) \times B(F_X). \quad (12)$$

*Proof.* From Theorem 3 we know that

$$\partial_F(X) = (-\partial_{\overline{F^X}}(\emptyset)) \times \partial_{F_X}(\emptyset).$$

Remember that  $\mathcal{Z}_X^-(\mathbf{s}) = \mathcal{Z}^-(\mathbf{s}, F(X) - s(X))$ , and hence the original problem is equivalent to

$$\min_{\mathbf{s}_X \in -\partial_{\overline{F^X}}(\emptyset)} \underbrace{-F(X) + \mathbf{s}_X(X)}_{-c} + \sum_{i \in X} \log(1 + e^{-s_i}) + \min_{\mathbf{s}_{V-X} \in \partial_{F_X}(\emptyset)} \sum_{i \in V-X} \log(1 + e^{-s_i}), \quad (13)$$

which can be rewritten as

$$-F(X) + \min_{\mathbf{s}_X \in -\partial_{\overline{F^X}}(\emptyset)} \sum_{i \in X} \log(1 + e^{s_i}) + \min_{\mathbf{s}_{V-X} \in \partial_{F_X}(\emptyset)} \sum_{i \in V-X} \log(1 + e^{-s_i}). \quad (14)$$

Note that

$$\begin{aligned} \min_{\mathbf{z} \in -\partial_{\overline{F^X}}(\emptyset)} \sum_{i \in X} \log(1 + \exp(z_i)) &= \min_{-\mathbf{z} \in \partial_{\overline{F^X}}(\emptyset)} \sum_{i \in X} \log(1 + \exp(z_i)) \\ &= \min_{\mathbf{s}_X \in \partial_{\overline{F^X}}(\emptyset)} \sum_{i \in X} \log(1 + \exp(-s_i)) \quad \text{Define } \mathbf{z} \equiv -\mathbf{s}_X. \end{aligned}$$

And the original problem is thus equivalent to

$$\underset{\mathbf{s}}{\text{minimize}} -F(X) + \sum_{i=1}^n \log(1 + e^{-s_i}) \quad \text{subject to} \quad \mathbf{s} \in P(\overline{F^X}) \times P(F_X).$$

It remains to show that the optimum is on the product of base polyhedra. Let  $\mathbf{s}^*$  be the optimum on the product of the base polyhedra (exists, as base polyhedra are compact). It satisfies

$$\forall \mathbf{y} \in B(\overline{F^X}) \times B(F_X): \nabla h(\mathbf{s}^*)^T \mathbf{y} > \nabla h(\mathbf{s}^*)^T \mathbf{s}^*.$$

As  $\nabla h(\mathbf{s}^*) \prec 0$ , we have from [9][Prop. 4.2] that the minimizer of the linear objective  $\nabla h(\mathbf{s}^*)$  over the full domain is on the product of base polyhedra, which implies that  $\mathbf{s}^*$  is a global optimum. □

**Lemma 7.** For any normalized submodular function  $F : 2^V \rightarrow \mathbb{R}$  we have that  $B(\overline{F}) = -B(F)$ .

*Proof.* This is well known, proof given for completeness.

$$\begin{aligned}
\mathbf{s} \in B(F) &\iff F(V) = s(V) \text{ and } \forall A \subseteq V: s(A) \leq F(A) \\
&\iff F(V) = s(V) \text{ and } \forall A \subseteq V: s(V - A) \leq F(V - A) \\
&\iff F(V) = s(V) \text{ and } \forall A \subseteq V: -s(A) \leq F(V - A) - \underbrace{s(V)}_{=F(V)} \\
&\iff -\overline{F}(V) = s(V) \text{ and } \forall A \subseteq V: -s(A) \leq \overline{F}(A) \\
&\iff -\mathbf{s} \in B(\overline{F})
\end{aligned}$$

□

*Proof of Lemma 2.* Using Lemma 7 and the fact that  $\log(1 + e^x) = x + \log(1 + e^{-x})$  we can rewrite the optimization problem in Lemma 6 as

$$\text{minimize}_{\mathbf{s}} -F(X) + s_X(X) + \sum_{i \in V} \log(1 + e^{-s_i}) \quad \text{subject to} \quad \mathbf{s} \in B(F^X) \times B(F_X).$$

Because  $s_X \in B(F^X)$ , we have that  $s_X(X) = F(X)$  and the claim follows from the fact that  $B(F^X) \times B(F_X) \subseteq B(F)$  [8][Lem. 3.1], which is the domain for  $X = \emptyset$ . □

**Divide-and-Conquer.** To be able to apply the divide and conquer algorithm, we have to be able to minimize  $\sum_{i \in V} \log(1 + e^{-s_i})$  over  $\mathbf{s} \in \mathbb{R}^V$  such that  $\sum_{i \in V} s_i = F(V)$ . We will show that the optimal vector has values equal to  $F(V)/n$ . The Lagrangian is equal to

$$\mathcal{L}(\mathbf{s}, \lambda) = \sum_{i=1}^n \log(1 + e^{-s_i}) + \lambda \left( \sum_i s_i - F(V) \right).$$

Setting the derivative with respect to  $s_i$  to zero gives us

$$\frac{1}{1 + e^{s_i}} = \lambda.$$

Now, if we set  $\lambda^* = 1/(e^{F(V)/n} + 1)$  and  $\mathbf{s}^* = (F(V)/n, \dots, F(V)/n)$ , then they satisfy the equation, are primal-dual feasible and by the KKT conditions are also primal-dual optimal, from which the claim follows.

**Derivation of the Dual Problem.** We will now show the dual for the more general problem in Lemma 6. Then, Lemma 3 follows for  $X = \emptyset$ .

**Lemma 8.** The Fenchel dual problem of Lemma 6 is

$$\text{maximize}_{\mathbf{p} \in [0,1]^V} \mathbb{H}[\mathbf{p}] - \overline{f^X}(\mathbf{p}_X) - f_X(\mathbf{p}_{V-X}) - F(X), \quad (15)$$

where  $\overline{f^X}(\mathbf{p}_X)$  and  $f_X$  are the Lovász extensions of  $\overline{F^X}$  and  $F_X$  respectively. Moreover, there is zero duality gap and the pair  $(\mathbf{s}^*, \mathbf{p}^*)$  is primal-dual optimal iff

$$\mathbf{p}^* = \left( \frac{1}{1 + \exp(s_i^*)}, \dots, \frac{1}{1 + \exp(s_n^*)} \right) \quad \text{and} \quad \mathbf{p}^{*T} \mathbf{s}^T = \overline{f^X}(\mathbf{p}_X^*) + f_X(\mathbf{p}_{V-X}^*). \quad (16)$$

*Proof.* The proof is using the same arguments as in [9][§8]. Remember that the referred problem was

$$\text{minimize}_{\mathbf{s}} -F(X) + \sum_{i \in V} \log(1 + e^{-s_i}) \quad \text{subject to} \quad \mathbf{s} \in B(\overline{F^X}) \times B(F_X).$$

Let us denote by  $I_C(\mathbf{s})$  the indicator function on the set  $C$ , equal to 0 on  $C$  and  $+\infty$  elsewhere. We also define  $\phi(x) = \log(1 + e^{-x})$ . We can then rewrite the problem as minimizing the following function over  $\mathbf{s} \in \mathbb{R}^V$

$$-F(X) + \sum_{i \in X} \phi(s_i) + \sum_{j \notin X} \phi(s_j) + I_{B(\overline{F^X})}(\mathbf{s}_X) + I_{B(F_X)}(\mathbf{s}_{V-X}).$$

Note that the conjugate of the indicator function over the base polyhedron is the Lovász extension  $I_{B(F)}^*(\mathbf{p}) = \sup_{\mathbf{s} \in B(F)} \mathbf{s}^T \mathbf{p} = f(\mathbf{p})$ . The function  $\phi$  has the following conjugate

$$\phi^*(p) = \begin{cases} \underbrace{-p \log(-p) + (1+p) \log(1+p)}_{-\mathbb{H}[-p]} & \text{if } p \in [-1, 0] \\ \infty & \text{otherwise} \end{cases},$$

where  $\mathbb{H}[p]$  is the entropy of a Bernoulli random variable with success probability  $p$ . Define

$$h(\mathbf{s}) = I_{B(\overline{F^X})}(\mathbf{s}_X) + I_{B(F_X)}(\mathbf{s}_{V-X}) \text{ and } g(\mathbf{s}) = \sum_{i \in V} \phi(s_i).$$

The Fenchel dual problem is equal to

$$\text{maximize}_{\mathbf{p}} -g^*(\mathbf{p}) - h^*(-\mathbf{p}).$$

Note that  $h$  and  $g$  are sums of functions which depend on different variables. Hence, they are sums of independent functions and their conjugates are equal to the sum of the conjugates of the summands [36][§3.3.2], i.e. the problem becomes

$$\text{maximize}_{\mathbf{p} \in [-1, 0]^n} \underbrace{\sum_{i=1}^n \mathbb{H}[-p_i]}_{-g^*(\mathbf{p})} - \underbrace{(\overline{f^X}(\mathbf{p}_X) + f_X(\mathbf{p}_{V-X}))}_{h^*(-\mathbf{p})}.$$

If we denote by  $\mathbb{H}[\mathbf{p}] = \sum_{i=1}^n \mathbb{H}[p_i]$  to be entropy of a Bernoulli random vector with element probabilities  $\mathbf{p}$  and we re-parametrize the problem in  $-\mathbf{p}$  we get the following equivalent form

$$\text{maximize}_{\mathbf{p} \in [0, 1]^n} \mathbb{H}[\mathbf{p}] - \overline{f^X}(\mathbf{p}) - f_X(\mathbf{p}).$$

The function  $g$  is smooth on its domain  $\mathbb{R}^n$  and this is sufficient to have no duality gap [37]. Moreover, from Theorem 2 in the same paper we know that  $(\mathbf{s}^*, \mathbf{p}^*)$  is primal-dual optimal iff  $\mathbf{p}^* \in (-\partial g(\mathbf{s}^*)) \cap \partial h(\mathbf{s}^*) \stackrel{g \text{ diff.}}{=} \{-\nabla g(\mathbf{s}^*)\} \cap \partial h(\mathbf{s}^*)$ . Note that this means that  $\mathbf{p}^* = -\nabla g(\mathbf{s}^*)$  and this is exactly the first part of the claim. To show the second part, remember that for the indicator function  $I_C(\cdot)$  the subdifferential at point  $\mathbf{x}$  is the set of all linear functions that achieve their maximum over  $C$  at  $\mathbf{x}$  [37]. Hence, as  $h$  is the indicator on the set, we have that  $B(\overline{F^X}) \times B(F_X)$

$$\begin{aligned} \partial h(\mathbf{s}^*) &= \{\mathbf{p}: \mathbf{p}^T \mathbf{s}^* = \sup_{\mathbf{s} \in B(\overline{F^X}) \times B(F_X)} \mathbf{p}^T \mathbf{s}\} \\ &= \{\mathbf{p}: \mathbf{p}^T \mathbf{s}^* = \underbrace{\sup_{\mathbf{s}_X \in B(\overline{F^X})} \mathbf{p}_X^T \mathbf{s}_X}_{\overline{f^X}(\mathbf{p}_X)} + \underbrace{\sup_{\mathbf{s}_{V-X} \in B(F_X)} \mathbf{p}_{V-X}^T \mathbf{s}_{V-X}}_{f_X(\mathbf{p}_{V-X})}\}. \end{aligned}$$

□

## B.2 Optimizing over supergradients

*Proof of Lemma 4.* Substituting the bar-supergradient  $\overline{\mathbf{s}}^X \in \partial^F(X)$  in the definitions for  $Z_X^+$  and  $Z_X^-$  gives us the following equations.

$$\log Z_X^+(\overline{\mathbf{s}}^X) = F(X) - \underbrace{\sum_{i \in X} F(i|V-i)}_{\overline{\mathbf{s}}^X(X)} + \sum_{i \in X} \log(1 + \exp(F(i|V-i))) + \sum_{i \notin X} \log(1 + \exp(F(i)))$$

$$\log Z_X^-(\overline{\mathbf{s}}^X) = -F(X) + \underbrace{\sum_{i \in X} F(i|V-i)}_{\overline{\mathbf{s}}^X(X)} + \sum_{i \in X} \log(1 + \exp(-F(i|V-i))) + \sum_{i \notin X} \log(1 + \exp(-F(i)))$$

We can simplify the equations to the the following ones.

$$\log Z_X^+(\overline{\mathbf{s}}) = F(X) + \sum_{i \in X} \log(1 + \exp(-F(i|V-i))) + \sum_{i \notin X} \log(1 + \exp(F(i)))$$

$$\log Z_X^-(\overline{\mathbf{s}}) = -F(X) + \sum_{i \in X} \log(1 + \exp(F(i|V-i))) + \sum_{i \notin X} \log(1 + \exp(-F(i)))$$

Note that any  $m : 2^V \rightarrow \mathbb{R}$  given as  $m(A) = \sum_{i \in A} a_i + \sum_{j \notin A} b_j$  for some numbers  $a_i, b_j$  is a modular plus constant, because this is equivalent to  $\sum_{i \in A} a_i + \sum_{i \in V} b_i + \sum_{i \in A} (-b_i)$ . The claims follow by writing the modular term in the standard form and ignoring the constant  $\sum_{i \in V} b_i$ .  $\square$

## C Mean-field methods and the multi-linear extension

For completeness we will derive the mean-field update equation. It is well known that the partial derivatives of the multi-linear extension [31] are constant functions and equal to

$$\partial_{q_i} \mathbb{E}_{\mathbf{q}}[F(A)] = \mathbb{E}_{\mathbf{q}_{+i}}[F(A)] - \mathbb{E}_{\mathbf{q}_{-i}}[F(A)],$$

where  $\mathbf{q}_{+i}$  is a distribution over  $V$  such that  $j \neq i$  is selected with probability  $q_j$  and the element  $i$  is picked with probability 1, and  $\mathbf{q}_{-i}$  is analogously defined over  $V - \{i\}$  (i.e.  $i$  is never sampled). Because the entropy is concave and the multi-linear extension is linear in each argument, we can perform coordinate ascent by picking  $q_i$  so that the partial derivative vanishes, i.e.

$$-\underbrace{(\mathbb{E}_{\mathbf{q}_{+i}}[F(A)] - \mathbb{E}_{\mathbf{q}_{-i}}[F(A)])}_{\Delta_i} + \log(1 - q_i) - \log q_i = 0.$$

Which means that we have to set  $q'_i$  to

$$q'_i = \frac{e^{-\Delta_i}}{e^{-\Delta_i} + 1} = \frac{1}{1 + e^{\Delta_i}}.$$

And this is the update equation for the naïve mean field method. Let us analyze  $\Delta_i$ , which is equal to

$$\begin{aligned} \Delta_i &= \sum_{A \subseteq V - i} P_{\mathbf{q}_{-i}}(A) F(A \cup \{i\}) - \sum_{A \subseteq V - i} P_{\mathbf{q}_{-i}}(A) F(A) \\ &= \sum_{A \subseteq V - i} P_{\mathbf{q}_{-i}}(A) F(i|A) = \mathbb{E}_{A \sim \mathbf{q}_{-i}}[F(i|A)]. \end{aligned}$$

And we get an interpretation in terms of the marginal gains. Note that computing these updates exactly is intractable for general functions  $F$ .

## D Proofs for the curvature-dependent approximation bounds

We would first like to point out a small technical difference. The usually made assumption on the polymatroid function is that  $\forall i \in V: G(\{i\}) > 0$  — because, as observed by [38],  $i$  has no effect on the function values and can be safely removed from the ground set. Because we do not work with a submodular optimization problem, we do not remove such elements. However, as we will only use the modular bounds on  $G$ , we can easily lift the results from the restriction of  $G$  to  $\{i \in V \mid G(\{i\}) > 0\}$ .

**Lemma 9.** *Let  $F(A) = G(A) + m(A)$  be submodular, where  $G(\cdot)$  is polymatroid and  $m(\cdot)$  is modular. Let  $s(A) + c$  for some modular function  $s(\cdot)$  be a lower bound on  $G$  and assume that for some  $\eta \in [0, 1]$  we have  $\forall A \subseteq V, (1 - \eta)G(A) \leq s(A) + c \leq G(A)$ . Then*

$$\log \mathcal{Z}^-(\mathbf{m} + \mathbf{s}, c) - \log \sum_{A \subseteq V} \exp(-F(A)) \leq \eta G_{\text{MAX}}, \text{ and} \quad (17)$$

$$\log \sum_{A \subseteq V} \exp(+F(A)) - \log \mathcal{Z}^+(\mathbf{m} + \mathbf{s}, c) \leq \eta G_{\text{MAX}}. \quad (18)$$

*Proof.*

$$\begin{aligned}
\log \mathcal{Z}^-(\mathbf{m} + \mathbf{s}, c) - \log \sum_{A \subseteq V} \exp(-F(A)) &= \log \frac{\sum_{A \subseteq V} \exp(-(m(A) + s(A) + c))}{\sum_{A \subseteq V} \exp(-F(A))} \\
&\leq \log \frac{\sum_{A \subseteq V} \exp(-(m(A) + (1 - \eta)G(A)))}{\sum_{A \subseteq V} \exp(-F(A))} && \text{By assumption.} \\
&= \log \frac{\sum_{A \subseteq V} \exp(-F(A) + \eta G(A))}{\sum_{A \subseteq V} \exp(-F(A))} \\
&\leq \log \frac{\sum_{A \subseteq V} \exp(-F(A) + \eta G_{\max})}{\sum_{A \subseteq V} \exp(-F(A))} && \eta \geq 0, F(A) \leq G_{\max}. \\
&= \eta G_{\max}
\end{aligned}$$

The other part is analogously proven.

$$\begin{aligned}
\log \sum_{A \subseteq V} \exp(+F(A)) - \log \mathcal{Z}^+(\mathbf{m} + \mathbf{s}, c) &= \log \frac{\sum_{A \subseteq V} \exp(F(A))}{\sum_{A \subseteq V} \exp(m(A) + s(A) + c)} \\
&\leq \log \frac{\sum_{A \subseteq V} \exp(F(A))}{\sum_{A \subseteq V} \exp(m(A) + (1 - \eta)G(A))} && \text{By assumption.} \\
&= \log \frac{\sum_{A \subseteq V} \exp(F(A))}{\sum_{A \subseteq V} \exp(F(A)) \exp(-\eta G(A))} \\
&\leq \eta G_{\max} && \eta \geq 0, F(A) \leq G_{\max}. \\
&&& \square
\end{aligned}$$

*Proof of Theorem 1.* The claim that  $\mathbf{s} + \mathbf{m}$  is in  $\partial_F(\emptyset)$  follows easily. Because  $\mathbf{s} \in \partial_G(\emptyset)$ , we have that  $\forall A \subseteq V: s(A) \leq G(A) \implies \forall A \subseteq V: s(A) + m(A) \leq G(A) + m(A) = F(A)$ . We will complete the proof by showing that the criterion in the previous lemma is satisfied for the given subgradient with  $\eta = \kappa$ , which implies the claim. Note that we have

$$\forall j \in V: G(j|V - \{j\}) \geq (1 - \kappa)G(\{j\}), \quad (19)$$

where the claim follows from the definition of curvature if  $G(\{j\}) > 0$ . Otherwise, because  $G$  is polymatroid, we have that  $0 \leq G(j|V - \{j\}) = G(\{j\}) = 0$ . Then, for any  $A \subseteq V$

$$\begin{aligned}
s(A) &= \sum_{i \in A} [G(S_i^\sigma) - G(S_{i-1}^\sigma)] \\
&= \sum_{i \in A} G(i|S_{i-1}^\sigma) && \text{Definition of marginal gain.} \\
&\geq \sum_{i \in A} G(i|V - \{i\}) && \text{Submodularity of } G \text{ and } S_{i-1}^\sigma \subseteq V - \{i\}. \\
&\geq (1 - \kappa) \sum_{i \in A} G(\{i\}) && \text{From eq. (19).} \\
&\geq (1 - \kappa)G(A). && z(A) = \sum_{i \in A} G(\{i\}) \text{ is in } \partial^G(\emptyset).
\end{aligned}$$

□

**Lemma 10.** Let  $F(A) = G(A) + m(A)$  be submodular, where  $G(\cdot)$  is polymatroid and  $m(\cdot)$  is modular. Let  $s(A) + c$  for some modular function  $s$  be an upper bound on  $G$  and assume that for some  $\eta \geq 0$  we have  $\forall A \subseteq V: G(A) \leq s(A) + c \leq (1 + \eta)G(A)$ . Then

$$\log \sum_{A \subseteq V} \exp(-F(A)) - \log \mathcal{Z}^-(\mathbf{m} + \mathbf{s}, c) \leq \eta G_{\max}, \text{ and} \quad (20)$$

$$\log \mathcal{Z}^+(\mathbf{m} + \mathbf{s}, c) - \log \sum_{A \subseteq V} \exp(+F(A)) \leq \eta G_{\max}. \quad (21)$$



*Proof.* We will use the following bound that follows from the assumption  $s(A) + c \leq G(A) + \eta G_{\max}$ .

$$\begin{aligned} \log \sum_{A \subseteq V} \exp(-F(A)) - \log \mathcal{Z}^-(\mathbf{m} + \mathbf{s}, c) &= \log \frac{\sum_{A \subseteq V} \exp(-F(A))}{\sum_{A \subseteq V} \exp(-(m(A) + s(A) + c))} \\ &\leq \log \frac{\sum_{A \subseteq V} \exp(-F(A))}{\sum_{A \subseteq V} \exp(-(m(A) + G(A) + \eta G_{\max}))} \quad \text{Bound above.} \\ &= \log \frac{\sum_{A \subseteq V} \exp(-F(A))}{\sum_{A \subseteq V} \exp(-F(A)) \exp(-\eta G_{\max})} \\ &= \eta G_{\max} \end{aligned}$$

The other part is analogously proven.

$$\begin{aligned} \log \mathcal{Z}^+(\mathbf{s}, c) - \log \sum_{A \subseteq V} \exp(F(A)) &= \log \frac{\sum_{A \subseteq V} \exp(m(A) + s(A) + c)}{\sum_{A \subseteq V} \exp(F(A))} \\ &\leq \log \frac{\sum_{A \subseteq V} \exp(m(A) + G(A) + \eta G_{\max})}{\sum_{A \subseteq V} \exp(F(A))} \quad \text{Bound above.} \\ &= \log \frac{\sum_{A \subseteq V} \exp(\eta G_{\max}) \exp(F(A))}{\sum_{A \subseteq V} \exp(F(A))} \\ &\leq \eta G_{\max} \quad \eta \geq 0, F(A) \leq G_{\max}. \end{aligned}$$

□

*Proof of Theorem 2.* Let us first show that  $\mathbf{s} + \mathbf{m} \in \partial^F(\emptyset)$ . This is easily seen to hold because  $\mathbf{s} \in \partial^G(\emptyset)$ , which implies that  $\forall A \subseteq V: s(A) \geq G(A) \implies \forall A \subseteq V: s(A) + m(A) \geq G(A) + m(A) = F(A)$ .

The first inequality in the theorem follows from the previous lemma and [38][Lem. 3.1], where it is shown that the chosen  $s$  satisfies the above condition with  $\eta = \kappa/(1 - \kappa)$ . Note that in the cited paper they consider only polymatroid functions that are non-zero on singleton elements. We can apply their result to  $G(\cdot)$  and  $s(\cdot)$  restricted on the set  $\bar{V} = \{i \in V \mid G(\{i\}) > 0\}$ . Then, for any  $A \subseteq V$ ,  $G(A) = G(\bar{V} \cap A)$ , and similarly,  $s(A) = \sum_{i \in A} G(\{i\}) = \sum_{i \in \bar{V} \cap A} G(\{i\}) = s(\bar{V} \cap A)$ , from which the claim follows. □

## E Experiments

Here we provide more information on the experiments.

**Decomposable Functions.** The data was generated using a Watts-Strogatz model with 100 nodes and parameters:  $k = 4$  (number of initial neighbors), and rewiring probability  $\rho = 0.7$ . The independent cascade model had the probability parameter set to 0.1. Let us also precisely state the likelihood model. Let  $N$  be the observed noisy set. If we set  $\alpha$  to be the false negative rate (active  $\rightarrow$  non-active) and  $\beta$  is the false positive rate (non-active  $\rightarrow$  active), then for any  $i \in V$

$$P(i \in N|A) = \begin{cases} 1 - \alpha & \text{if } i \in A \\ \beta & \text{if } i \notin A \end{cases}. \quad (22)$$

Or, if we write it in a different form, we have the following.

$$P(i \in N|A) = (1 - \alpha)^{[i \in A]} \beta^{1 - [i \in A]} = e^{[i \in A] \log \frac{1 - \alpha}{\beta} + \log \beta} \quad (23)$$

$$P(i \notin N|A) = \alpha^{[i \in A]} (1 - \beta)^{1 - [i \in A]} = e^{[i \in A] \log \frac{\alpha}{1 - \beta} + \log(1 - \beta)} \quad (24)$$

The modular likelihood is then (the minus in front is because we use a log-supermodular distribution)

$$s(\{i\}) = \begin{cases} -\log \frac{1 - \alpha}{\beta} & \text{if } i \in N \\ -\log \frac{\alpha}{1 - \beta} & \text{if } i \notin N \end{cases}. \quad (25)$$

## F Cardinality constraints

We will w.l.o.g. assume that  $V = \{1, 2, \dots, n\}$ . Let us first show how to evaluate the bounds for log-supermodular functions as the ones for log-submodular easily follow. Let us consider the form of the bounds

$$\mathcal{Z}^-(\mathbf{s}, c) = \exp(-c) \sum_{\mathbf{x} \in \{0,1\}^n} \prod_{i=1}^n \exp(-s_i)^{x_i}.$$

Under a cardinality constraint if we consider sets of size at most  $k$ , we get the following bound instead.

$$\mathcal{Z}_k^-(\mathbf{s}, c) = \exp(-c) \sum_{\substack{\mathbf{x} \in \{0,1\}^n \\ \|\mathbf{x}\|_1 \leq k}} \prod_{i=1}^n \exp(-s_i)^{x_i}.$$

The  $m$ -th elementary symmetric polynomial is defined as

$$a_0(x_1, \dots, x_n) = 1, \quad a_m(x_1, \dots, x_n) = \sum_{1 \leq i_1 < i_2 < \dots < i_m \leq n} x_{i_1} \dots x_{i_m}$$

By taking the logarithm we can rewrite the bound as

$$\log \mathcal{Z}_k^-(\mathbf{s}, c) = -c + \log \sum_{m=0}^k a_m(e^{-s_1}, \dots, e^{-s_n}).$$

Define  $p_k(x_1, \dots, x_n) = \sum_{i=1}^n x_i^k$ , then using Newton's identities

$$a_k(x_1, \dots, x_n) = \frac{1}{k} \sum_{i=1}^k (-1)^{i-1} a_{k-i}(x_1, \dots, x_n) p_i(x_1, \dots, x_n).$$

And we can evaluate the bound by recursively computing the elementary symmetric polynomials.

**Frank-Wolfe.** We will show that the analogue of Lemma 2 is again a convex, but non-separable, problem and can be solved by applying the Frank-Wolfe algorithm. Moreover, we will also show that we will obtain the best bound by only considering the subdifferential at  $\emptyset$ . We define for  $\mathbf{s} \in \partial_F(X)$  the shorthand  $\mathcal{Z}_{k,X}^-(\mathbf{s}) = \mathcal{Z}_k^-(\mathbf{s}, F(X) - s(x))$ .

**Lemma 11.** *For all  $X \subseteq V$  we have that  $\min_{\mathbf{s} \in \partial_F(\emptyset)} \mathcal{Z}_{k,\emptyset}^-(\mathbf{s}) \leq \min_{\mathbf{s} \in \partial_F(X)} \mathcal{Z}_{k,X}^-(\mathbf{s})$ . The latter problem is equivalent to*

$$\log \sum_{m=0}^k a_m(e^{-s_1}, \dots, e^{-s_n}) \quad \text{subject to} \quad \mathbf{s} \in B(F). \quad (26)$$

*Proof.* Follows from the following lemma and the fact that  $B(F^X) \times B(F_X) \subseteq B(F)$  [8][Lem. 3.1], which is the domain for  $X = \emptyset$ .  $\square$

**Lemma 12.** *For all  $X \subseteq V$  we have that  $\min_{\mathbf{s} \in \partial_F(X)} \mathcal{Z}_{k,X}^-(\mathbf{s})$  is equivalent to*

$$\text{minimize}_{\mathbf{s}} \log \sum_{m=0}^k a_m(e^{-s_1}, \dots, e^{-s_n}) \quad \text{subject to} \quad \mathbf{s} \in B(F^X) \times B(F_X). \quad (27)$$

*Proof.* From Theorem 3 we know that the problem  $\min_{\mathbf{s} \in \partial_F(X)} \mathcal{Z}_{k,X}^-(\mathbf{s})$  is equivalent to

$$\text{minimize}_{\mathbf{s}} -F(X) + s(X) + \log \sum_{m=0}^k a_m(e^{-s_1}, \dots, e^{-s_n}) \quad \text{subject to} \quad \mathbf{s} \in (-P(\overline{F^X})) \times P(F_X). \quad (28)$$

Recall that  $P(\cdot)$  denotes the submodular polyhedron (see Appendix B.1). Note that each term  $a_m(e^{-s_1}, \dots, e^{-s_n})$  is log-convex. Hence, the objective is convex, as log-convex functions are closed under summation [36][§3.5.2]. Let us analyze the gradient of  $\mathcal{Z}_{k,X}^-$ .

$$\nabla \log \mathcal{Z}_{k,X}^-(\mathbf{s}) = \begin{pmatrix} \mathbf{1}_X \\ \mathbf{0}_{V-X} \end{pmatrix} - \frac{\sum_{m=0}^k \nabla a_m(e^{-s_1}, \dots, e^{-s_n})}{\sum_{m=0}^k a_m(e^{-s_1}, \dots, e^{-s_n})}.$$

Note that  $[\nabla a_m(e^{-s_1}, \dots, e^{-s_n})]_{s_i} = -e^{-s_i} a_{m-1}(e^{-s_1}, \dots, e^{s_{i-1}}, e^{s_{i+1}}, \dots, e^{-s_n})$ , which implies that we can write the gradient as follows.

$$\nabla \log \mathcal{Z}_{k,X}^-(\mathbf{s}) = \begin{pmatrix} \mathbf{1}_X \\ \mathbf{0}_{V-X} \end{pmatrix} - \frac{\sum_{m=0}^k \begin{pmatrix} e^{-s_1} a_{m-1}(e^{-s_2}, \dots, e^{-s_n}) \\ \vdots \\ e^{-s_i} a_{m-1}(e^{-s_1}, \dots, e^{s_{i-1}}, e^{s_{i+1}}, \dots, e^{-s_n}) \\ \vdots \\ e^{-s_n} a_{m-1}(e^{-s_1}, \dots, e^{-s_{n-1}}) \end{pmatrix}}{\sum_{m=0}^k a_m(e^{-s_1}, \dots, e^{-s_n})}$$

First observe that the partial derivatives with respect to  $s_i$  for  $i \notin X$  are immediately seen to be strictly negative. Otherwise, if  $i \in X$ , the partial derivative is equal to

$$1 - \frac{\sum_{m=0}^{k-1} e^{-s_i} a_m(e^{-s_1}, \dots, e^{-s_{i-1}}, e^{-s_{i+1}}, \dots, e^{-s_n})}{\sum_{m=0}^k a_m(e^{-s_1}, \dots, e^{-s_n})}.$$

And this is clearly strictly positive, as the numerator denominator contains all summands in the numerator and strictly more. We will now show that the optimum over  $\mathcal{B} = (-B(\overline{F^X})) \times B(F_X)$  is a global optimum. Let  $(-\mathbf{s}_X^*, \mathbf{s}_{V-X}^*)$  be optimal over  $\mathcal{B}$  and let  $(-\mathbf{g}_X, \mathbf{g}_{V-X})$  be the gradient at that point, where  $\mathbf{g}_X, \mathbf{g}_{V-X} \prec 0$ . We have for any  $\mathbf{m} \in \mathcal{B}$

$$(-\mathbf{g}_X^*, \mathbf{g}_{V-X}^*)((\mathbf{m}_X, \mathbf{m}_{V-X})^T - (-\mathbf{s}_X^*, \mathbf{s}_{V-X}^*)^T) \geq 0.$$

Hence,  $\mathbf{s}_{V-X}^*$  is a minimizer of the linear function  $\mathbf{g}_{V-X}^*$  over  $B(F_X)$ . Because  $\mathbf{g}_{V-X}^* \prec 0$ , by the same argument as in the proof of Lemma 6, we get that  $\mathbf{s}_{V-X}^*$  is optimal over  $P(F_X)$ . Similarly,  $-\mathbf{s}_X^*$  is a minimizer of the linear function  $-\mathbf{g}_X$  over  $-B(\overline{F^X})$ . Or equivalently,  $\mathbf{s}_X^*$  is a minimizer of the linear function  $\mathbf{g}_X$  over  $B(\overline{F^X})$ , and the claim follows. Finally, from Lemma 7 we know that  $-B(\overline{F^X}) = B(F^X)$ , which implies that  $s(X) = s_X(X) = F(X)$ , and this completes the proof.  $\square$
